# Supplementary material for: A selective electrochemical sensor for caffeic acid and photocatalyst for metronidazole drug pollutant - A dual role by rod-like SrV2O6
Source: PubMed Central journal article supplement (PMC5543073; doi:10.1038/s41598-017-07423-1), 2017-08-03
Supplement: 41598_2017_7423_MOESM1_ESM.pdf [file 41598_2017_7423_MOESM1_ESM.pdf]

**A selective electrochemical sensor for caffeic acid and photocatalyst for metronidazole drug pollutant - A dual role by rod-like SrV<sub>2</sub>O<sub>6</sub>**

**R.Karthik<sup>1</sup>, J.Vinoth Kumar<sup>2</sup>, Shen-Ming Chen<sup>1\*</sup>, P. Senthil Kumar<sup>2,3</sup>, V. Selvam<sup>2</sup>,  
V. Muthuraj<sup>2\*</sup>**

<sup>1</sup>Department of Chemical Engineering, National Taipei University of Technology, No. 1, Section 3, Chung-Hsiao East Road, Taipei 106, Taiwan, ROC.

<sup>2</sup>Department of Chemistry, VHNSN College, Virudhunagar – 626001, Tamilnadu, India.

<sup>3</sup>Department of Chemistry, International Research Center, Kalasalingam University, Krishnankoil - 626126, Virudhunagar, Tamilnadu, India

**\* Authors for Correspondence**

E-mail: [smchen78@ms15.hinet.net](mailto:smchen78@ms15.hinet.net), Tel: +886 2270 17147, Fax: +886 2270 25238.

E-mail: [muthuraj75@gmail.com](mailto:muthuraj75@gmail.com), Tel: +919940965228

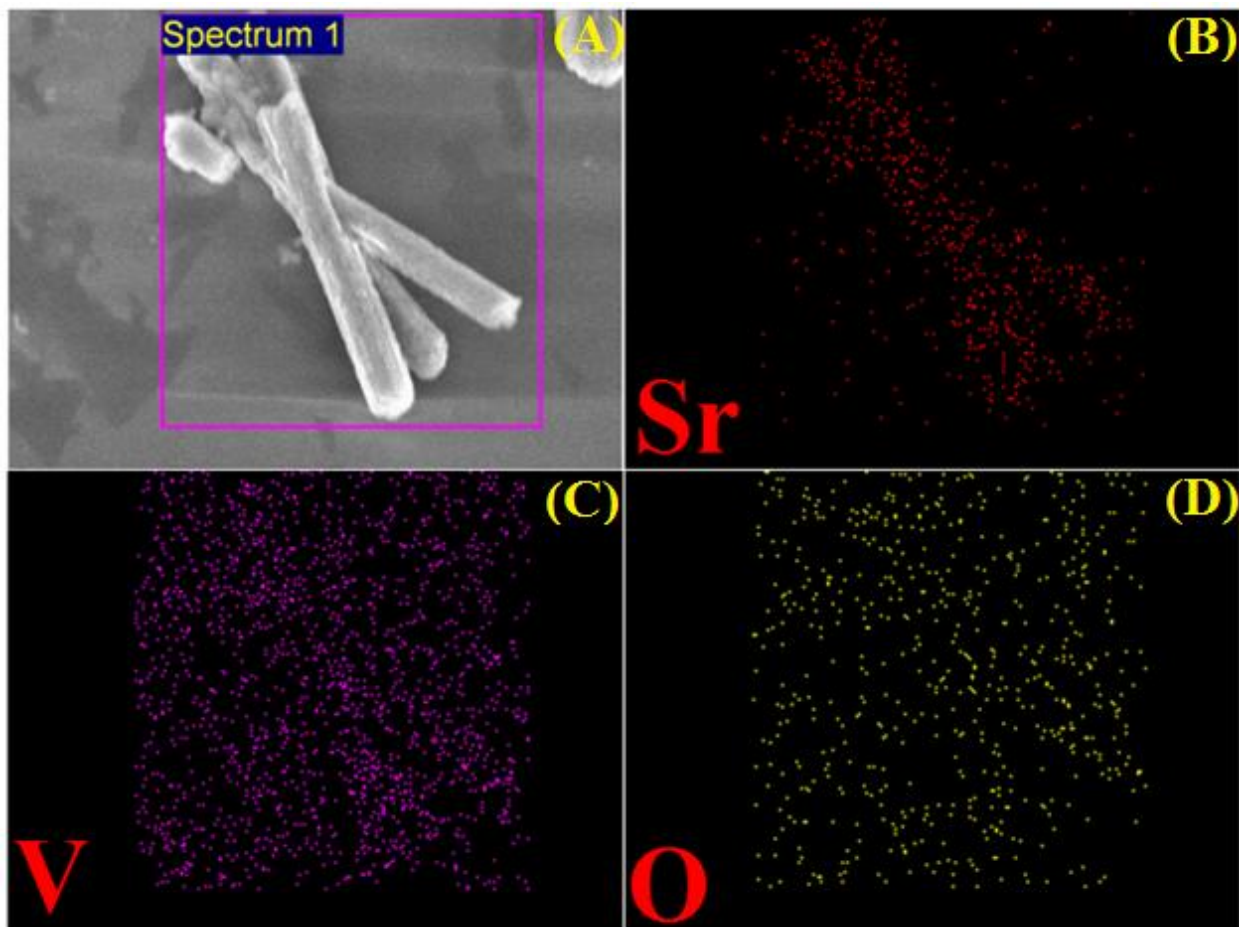

**Fig. S1.** SEM images of rod-like SrV<sub>2</sub>O<sub>6</sub> (A) and overall EDX mapping of SrV<sub>2</sub>O<sub>6</sub> for Strontium (B) Vanadium (C) and Oxygen (D).

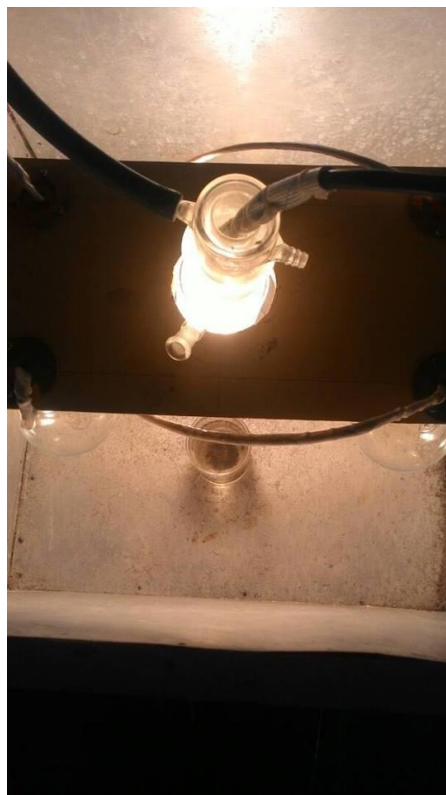

**Fig. S2.** Experimental set up for the photodegradation of MNZ over rod-like  $\text{SrV}_2\text{O}_6$ .
